# Supplementary material for: Single-cell RNA-seq reveals heterogeneity in hiPSC-derived muscle progenitors and E2F family as a key regulator of proliferation
Source: Life Sci Alliance. 2022 Apr 22;5(8):e202101312. doi: 10.26508/lsa.202101312 (PMC9034463; doi:10.26508/lsa.202101312)
Supplement: Supplementary file 3 [file LSA-2021-01312_TableS3.xlsx]

## Sheet: Table S3
		Table S3. List of primers used for the real time RT-qPCR experiments.
		RT-qPCR PRIMERS
		Gene	Forward Sequence	Reverse Sequence
		PAX7	AGGGCCTCCTGCTTGTTTAT	GGTTTTGCCCAACTCAGTGT
		MYF5	TGCCCTTGTTAATTACCGGAGCGA	TATGCAGGAGCCGTCGTAGAAGT
		MYOD1	ACGTGAGGACGAGCATGTG	GTGCAGCGCTTGAGTGTCT
		MYOGENIN (MYOG)	TGGGCGTGTAAGGTGTGTAA	CGATGTACTGGATGGCACTG
		MEF2C	CGAGATACCCACAACACACG	CGCTTGACTGAGGGACTTTC
		E2F1	ACGCTATGAGACCTCACTGA	TCCTTGGGTCAACCCCTCAAG
		E2F2	CGTCCCTGAGTTCCCAACC	GCGAAGTGTCATACCGAGTC
		E2F7	AGGCAGCCCAGACTAGATTT	GCTGGCAGCATAATGAGCA
		GAPDH	CGCCCCCGGTTTCTATAAATTG	AAGAAGATGCGGCTGACTGT
